# Supplementary material for: Ecological Traits Affect The Seasonal Migration Patterns Of Resident Birds Along A Subtropical Altitudinal Gradient
Source: Research Square preprint supplement (doi:10.21203/rs.3.rs-1448360/v1), 2022-03-18
Supplement: Supplementary file 1 [file dab5051a5cd1097783f66de7.xlsx]

## Sheet:  species' trait
Species	Territoriality	DIET	HWI	bodymass	AnnualTemp	TempRange	Neet Hight	Abundance-weighted Rrange Centre Shift	Lower-elevation Limit Shift	Upper-elevation Limit Shift
Yuhina_diademata	weak	omnivore	15.0545	1.07918	13.7597	27.3541	scrub	-405.718	-800	400
Garrulax_elliotii	strong	omnivore	6.12723	1.65321	7.57092	32.7501	scrub	-601.943	0	-400
Dendrocopos_cathpharius	strong	invertebrates	26.7566	1.4877	25.5991	25.9299	Canopy	-109.509	0	0
Megalaima_virens	weak	omnivore	21.672	2.30535	18.5214	24.5847	Canopy	6.57135	400	0
Corvus_macrorhynchos	weak	omnivore	38.0385	2.71024	14.9627	28.7005	Canopy	579.764	400	0
Garrulax_affinis	strong	omnivore	6.88589	1.8613	9.10886	27.9066	scrub	-796.657	-1600	0
Parus_rubidiventris	weak	omnivore	18.7467	1.07298	6.58487	31.546	Canopy	118.79	0	0
Parus_davidi	weak	omnivore	15.9602	1.01284	10.9478	29.9688	Canopy	-95.1648	-400	-400
Aegithalos_concinnus	weak	invertebrates	17.6318	0.78533	17.4092	26.5121	Canopy	-315.481	0	-400
Urocissa_erythrorhyncha	strong	omnivore	19.6228	2.18047	18.5816	26.443	Canopy	-141.517	-400	0
Turdus_rubrocanus	weak	omnivore	27.7704	1.96473	9.21436	30.4688	scrub	-232.952	0	-800
Pyrrhula_erythaca	weak	omnivore	20.5607	1.27875	9.13946	32.9207	scrub	-218.74	-800	-800
Spizixos_semitorques	weak	omnivore	14.8525	1.59106	15.7416	28.7468	Canopy	37.017	0	0
Parus_monticolus	weak	invertebrates	15.6648	1.14457	14.3854	26.1264	Canopy	-465.755	0	0
Babax_lanceolatus	strong	omnivore	7.54333	1.50515	16.3223	26.5875	scrub	-205.451	-400	400
Garrulus_glandarius	weak	omnivore	17.5093	2.20265	7.15759	36.2001	Canopy	-756.48	0	-800
Yuhina_gularis	weak	omnivore	18.5434	1.31765	14.9493	25.0005	scrub	-365.92	-400	-400
Nucifraga_caryocatactes	weak	omnivore	22.9565	2.26129	-0.0474758	44.6765	Canopy	-376.783	400	-400
Parus_major	weak	invertebrates	17.0027	1.21085	9.68547	35.0539	Canopy	194.692	0	-400
Paradoxornis_webbianus	weak	omnivore	13.8935	1.03743	11.6533	34.6401	scrub	2.27481	0	0

## Sheet: Breeding Season
species	1200	1600	2000	2400	2800	3200	3600		abundance-weighted range centre	lower range limit	upper range limit
Yuhina_diademata	0	0	2	33	0	0	0	35	2377.14	2000	2400
Garrulax_elliotii	1	3	2	22	20.9	14	12	74.9	2778.71	1200	3600
Dendrocopos_cathpharius	0	1	0	1	3.9	0	0	5.9	2509.87	1600	2800
Megalaima_virens	14	20	25	0	0	0	0	59	1674.58	1200	2000
Corvus_macrorhynchos	7	6	0	0	5.1	2	0	20.1	1914.03	1200	3200
Garrulax_affinis	0	0	0	0	6.5	4	7	17.5	3192.92	2800	3600
Parus_rubidiventris	0	0	0	1	10	21	2	34	3064.35	2400	3600
Parus_davidi	0	0	0	10	2.6	0	0	12.6	2469.48	2400	2800
Aegithalos_concinnus	3	12	4	0	0	0	0	19	1621.05	1200	2000
Urocissa_erythrorhyncha	0	22	18	11	25.3	0	0	76.3	2197.52	1600	2800
Turdus_rubrocanus	0	0	1	16	17.2	2	0	36.2	2608.41	2000	3200
Pyrrhula_erythaca	0	0	0	5	11.9	0	0	16.9	2666.18	2400	2800
Spizixos_semitorques	1	7	51	0	0	0	0	59	1938.98	1200	2000
Parus_monticolus	17	29	44	29	14.9	0	0	133.9	1979.61	1200	2800
Babax_lanceolatus	0	15	16	0	0	0	0	31	1806.45	1600	2000
Garrulus_glandarius	1	8	18	43	0	0	0	70	2188.57	1200	2400
Yuhina_gularis	0	3	6	30	8.9	0	0	47.9	2361.99	1600	2800
Nucifraga_caryocatactes	1	1	1	10	0	0	0	13	2215.38	1200	2400
Parus_major	3	11	1	0	0.9	0	0	15.9	1609.73	1200	2800
Paradoxornis_webbianus	35	56	0	0	0	0	0	91	1446.15	1200	1600

## Sheet: Non-breeding Season
species	1200	1600	2000	2400	2800	3200	3600		abundance-weighted range centre	lower range limit	upper range limit
Yuhina_diademata	9.3	12.87	40.8	15.45	5	0	0	83.42	1971.42	1200	2800
Garrulax_elliotii	4.29	21.62	15.71	10.86	22	3.16	0	77.64	2176.77	1200	3200
Dendrocopos_cathpharius	0	0.45	2.35	0.81	3	0	0	6.61	2400.37	1600	2800
Megalaima_virens	0	4.98	1.24	0	0	0	0	6.22	1681.15	1600	2000
Corvus_macrorhynchos	0	2.37	0	10.13	9	0.32	0	21.82	2493.8	1600	3200
Garrulax_affinis	1.23	13.4	23.65	23.9	37	2.34	3.76	105.28	2396.26	1200	3600
Parus_rubidiventris	0	0	0	4.14	12	37.18	17.24	70.56	3183.14	2400	3600
Parus_davidi	0	0	1.08	15.98	0	0	0	17.06	2374.31	2000	2400
Aegithalos_concinnus	2.38	1.06	0	0	0	0	0	3.44	1305.57	1200	1600
Urocissa_erythrorhyncha	1.08	19.18	3.29	4.45	11	0	0	39	2056	1200	2800
Turdus_rubrocanus	0	0	6.77	103.4	0	0	0	110.17	2375.46	2000	2400
Pyrrhula_erythaca	0	3.28	16.07	0	28	0	0	47.35	2447.44	1600	2000
Spizixos_semitorques	0.28	1.26	28.88	0	0	0	0	30.42	1976	1200	2000
Parus_monticolus	8.33	8.15	1.16	0	1	0	0	18.64	1513.86	1200	2800
Babax_lanceolatus	1.36	6.12	0.52	0.4	0	0	0	8.4	1601	1200	2400
Garrulus_glandarius	6.11	8.39	0	0	0	0	0	14.5	1432.09	1200	1600
Yuhina_gularis	3.59	12.27	44.04	18.68	0	0	0	78.58	1996.07	1200	2400
Nucifraga_caryocatactes	0	2.43	3.44	0	0	0	0	5.87	1838.6	1600	2000
Parus_major	1.24	4.39	0	2.8	0	0	0	8.43	1804.42	1200	2400
Paradoxornis_webbianus	43.81	71.78	0	0	0	0	0	115.59	1448.43	1200	1600
